# Supplementary material for: Evaluation of Multivariate Biomarker Indexes Application in Ecotoxicity Tests with Marine Diatoms Exposed to Emerging Contaminants
Source: Preprints.org preprint supplement (doi:10.20944/preprints202103.0735.v1), 2021-03-30
Supplement: Supplementary file 2 [file supplementary]

Table S1. Growth inibitition (IC50), catalase (CAT), ascorbate peroxidase (APX), superoxide dismutase (SOD) activities and thiobarbituric acid reactive substances (TBARS) concentration in *P. tricornutum* cells exposed to the different emerging contaminants (average ± standard error, N=3, letters denote significant differences at p < 0.05). † linear regression slope (+, positive; - negative) and ‡ Spearman correlation coefficient (r2) of the relation between each biomarker and the external concentration applied.

| **Exposure** |  | **IC50**  **(mg L-1)** | **Concentration**  **(mg L-1)** | **CAT**  **(U mg-1 protein)** | **APX**  **(U mg-1 protein)** | **SOD**  **(U mg-1 protein)** | **TBARS**  **([MDA] pmol 106 cell -1)** | **Reference** |
| --- | --- | --- | --- | --- | --- | --- | --- | --- |
| Propranolol |  | 194.6 | 0 | 23.4 ± 1.5 | 0.6 ± 0.1 | 3.3 ± 0.2 | 0.02 ± 0.00 | Duarte et al., 2020 |
|  | 0.3 | 19.7 ± 2.7 | 0.1 ± 0.0 | 2.7 ± 0.2 | 0.03 ± 0.00 |
|  | 8 | 21.7 ± 4.0 | 0.4 ± 0.0 | 2.8 ± 0.2 | 0.02 ± 0.00 |
|  | 80 | 20.5 ± 0.7 | 0.4 ± 0.1 | 3.3 ± 0.1 | 0.04 ± 0.00 |
|  | 150 | 22.0 ± 0.8 | 0.5 ± 0.1 | 3.7 ± 0.2 | 0.08 ± 0.01 |
|  | 300 | 16.3 ± 2.3 | 0.3 ± 0.0 | 2.9 ± 0.3 | 0.06 ± 0.01 |
|  | Slope † | - | - | + | + |
|  | *r2* ‡ | - 0.36 | - 0.09 | 0.87 * | 0.72 * |
| Fluoxetine |  |  | 0 | 17.1 ± 3.1 | 0.3 ± 0.0 | 3.6 ± 0.2 | 0.02 ± 0.00 | Feijão et al., 2020 |
|  |  | 0.3 | 14.0 ± 2.4 | 0.3 ± 0.0 | 3.1 ± 0.3 | 0.03 ± 0.00 |
|  |  | 0.6 | 12.9 ± 1.1 | 0.3 ± 0.0 | 2.4 ± 0.1 | 0.03 ± 0.00 |
|  | 47.3 | 20 | 13.0 ± 0.5 | 0.3 ± 0.0 | 2.4 ± 0.1 | 0.03 ± 0.00 |
|  |  | 40 | 18.4 ± 1.4 | 0.3 ± 0.0 | 3.0 ± 0.3 | 0.03 ± 0.00 |
|  |  | 80 | 20.6 ± 7.0 | 1.0 ± 0.2 | 6.5 ± 1.0 | 0.11 ± 0.02 |
|  |  | Slope | + | + | + | + |
|  |  | *r2* | 0.25 | 0.46 | 0.16 | 0.73 * |
| Ibuprofen |  | 350.6 | 0 | 13.7 ± 1.3 | 0.3 ± 0.0 | 2.2 ± 0.2 | 0.01 ± 0.00 | Silva et al., 2020 |
|  | 0.8 | 19.5 ± 2.2 | 0.6 ± 0.0 | 4.4 ± 0.1 | 0.02 ± 0.00 |
|  | 3 | 23.4 ± 5.8 | 0.6 ± 0.1 | 4.2 ± 0.2 | 0.02 ± 0.00 |
|  | 40 | 15.2 ± 2.4 | 0.7 ± 0.2 | 3.5 ± 0.2 | 0.03 ± 0.00 |
|  | 100 | 19.2 ± 3.2 | 0.8 ± 0.1 | 3.4 ± 0.2 | 0.04 ± 0.00 |
|  | 300 | 17.3 ± 3.1 | 0.7 ± 0.2 | 3.0 ± 0.5 | 0.03 ± 0.00 |
|  | Slope | - | + | - | + |
|  | *r2* | 0.13 | 0.61 * | -0.10 | 0.77 * |
| Glyphosate |  | 225.9 | 0 | 24.0 ± 3.7 | 0.6 ± 0.0 | 4.2 ± 0.2 | 0.02 ± 0.00 | Carvalho et al., 2020 |
|  | 10 | 22.9 ± 3.1 | 0.4 ± 0.1 | 3.5 ± 0.1 | 0.04 ± 0.00 |
|  | 50 | 21.8 ± 3.4 | 0.5 ± 0.0 | 3.6 ± 0.3 | 0.04 ± 0.00 |
|  | 100 | 20.9 ± 2.0 | 0.6 ± 0.1 | 3.7 ± 0.3 | 0.04 ± 0.00 |
|  | 250 | 25.9 ± 3.6 | 1.1 ± 0.5 | 3.3 ± 0.6 | 0.13 ± 0.02 |
|  | 500 | 31.8 ± 2.2 | 0.9 ± 0.1 | 1.5 ± 0.1 | 0.16 ± 0.01 |
|  | Slope | + | + | - | + |
|  | *r2* | 0.41 | 0.60 * | -0.64 * | 0.92 * |
| SDS |  | 11.4 | 0 | 20.3 ± 2.5 | 1.1 ± 0.3 | 3.7 ± 0.1 | 0.02 ± 0.00 | Silva et al., in prep |
|  | 0.1 | 14.6 ± 2.6 | 0.5 ± 0.0 | 3.2 ± 0.6 | 0.03 ± 0.00 |
|  | 1 | 19.1 ± 1.0 | 1.2 ± 0.1 | 5.0 ± 0.1 | 0.03 ± 0.00 |
|  | 3 | 16.0 ± 2.3 | 1.1 ± 0.1 | 4.5 ± 0.5 | 0.03 ± 0.00 |
|  | 10 | 14.0 ± 2.3 | 0.3 ± 0.0 | 3.9 ± 0.1 | 0.02 ± 0.00 |
|  | Slope | - | - | + | - |
|  | *r2* | -0.39 | -0.38 | 0.32 | -0.11 |
